# Supplementary figures and images for: Automated Intracellular Calcium Profiles Extraction from Endothelial Cells Using Digital Fluorescence Images
Source: MDPI journal article supplement (doi:10.3390/ijms19113440), 2018-11-02

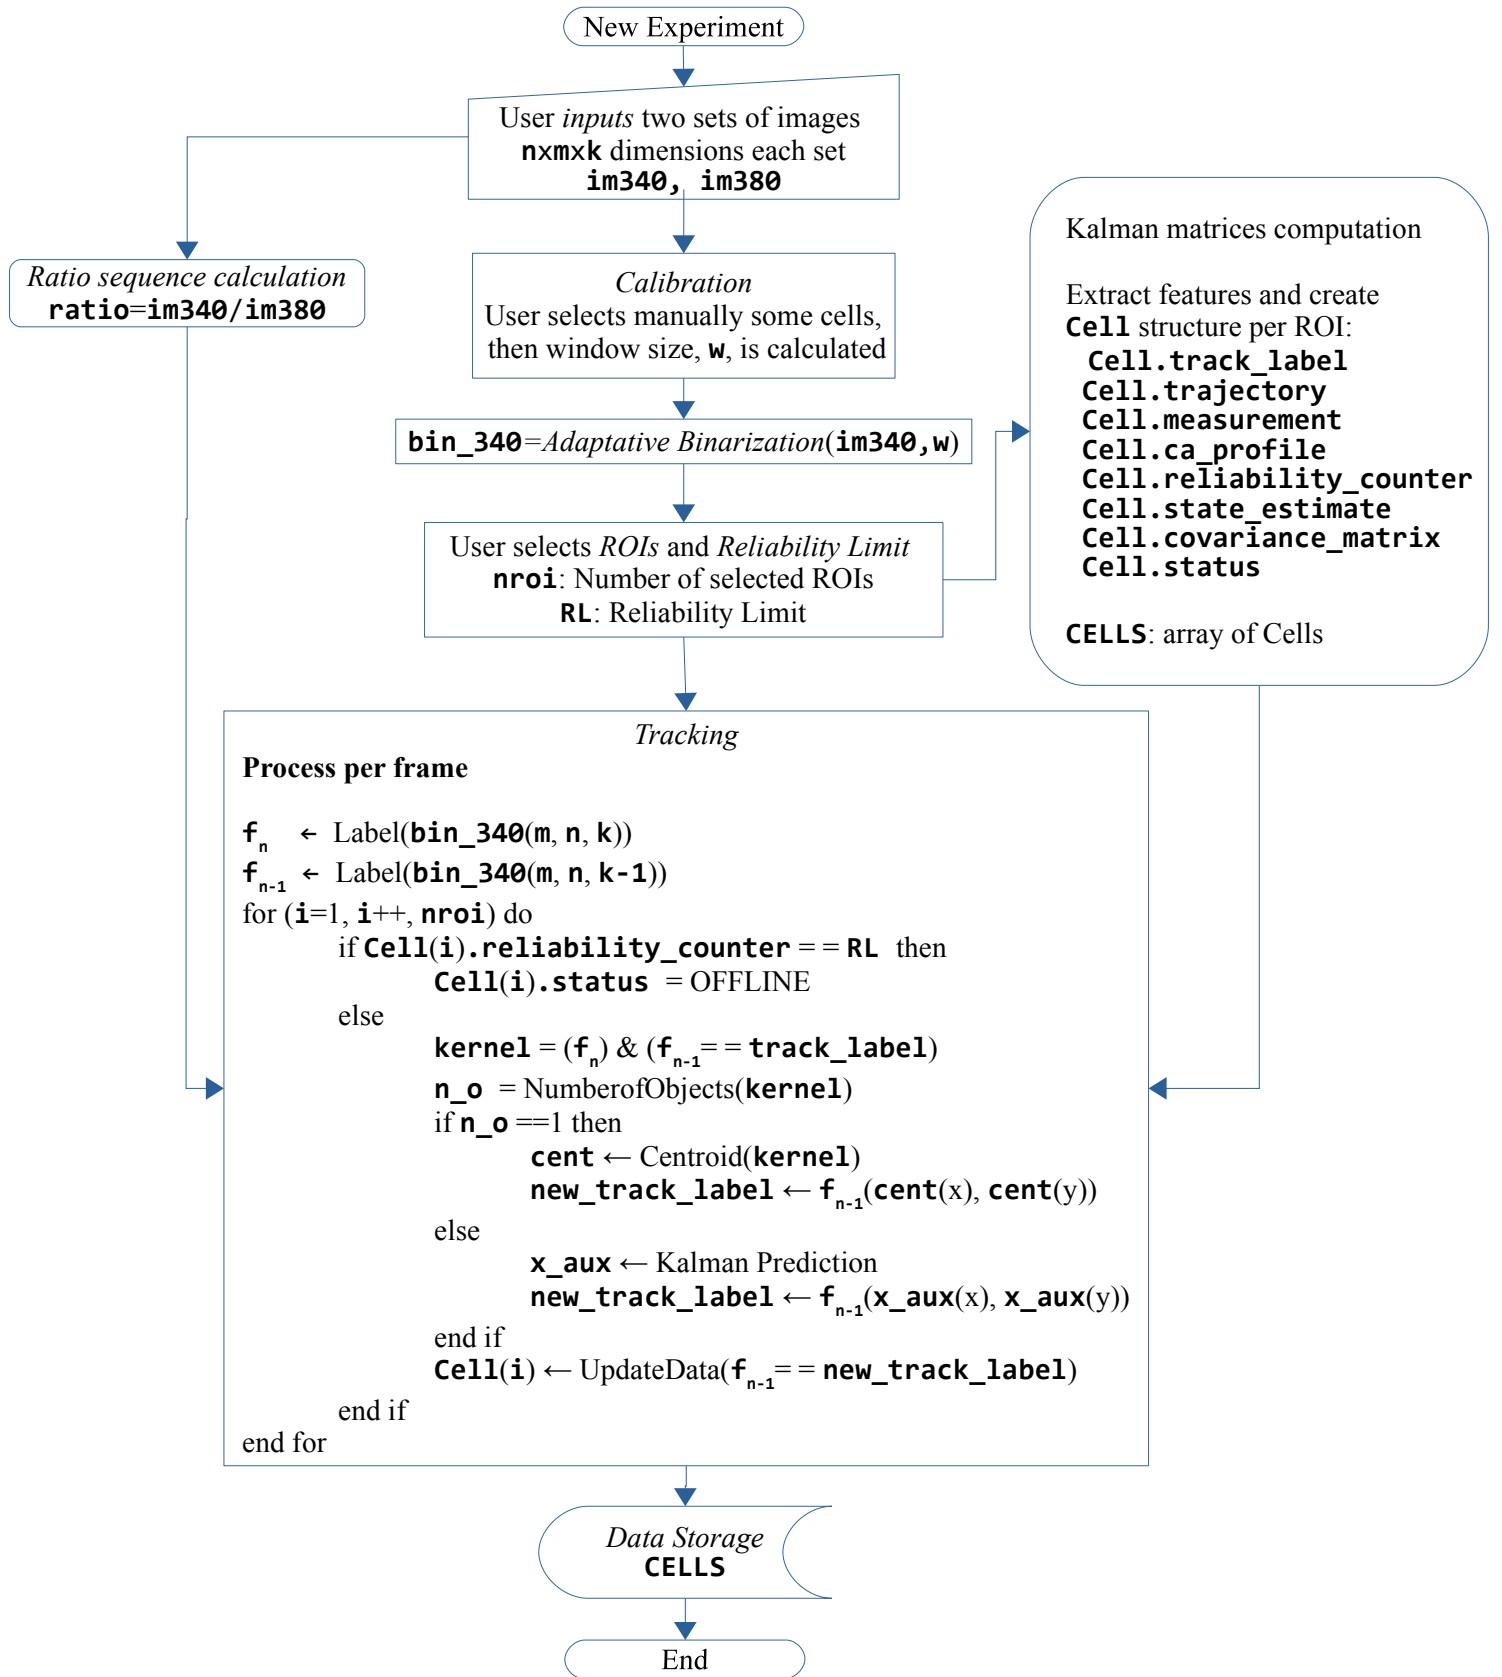

Supplement: s1 [file s1]
